# Supplementary material for: Associations of Two Obesity-Related Single-Nucleotide Polymorphisms with Adiponectin in Chinese Children
Source: Hindawi journal article supplement (doi:10.1155/2017/6437542), 2017-01-01
Supplement: f2 [file 6437542.f2.pdf]

## Supplementary tables

Supplementary TABLE 1: Basic characteristics of study participants.

| Characteristics                   | All         |
|-----------------------------------|-------------|
| N                                 | 3503        |
| Male (%)                          | 50.8        |
| Age (years)                       | 12.4±3.1    |
| BMI (kg m <sup>-2</sup> )         | 21.9±4.9    |
| Weight statues (%)                |             |
| Obese                             | 35.0        |
| Overweight                        | 18.5        |
| Normal weight                     | 46.0        |
| Leptin (µg L <sup>-1</sup> )      | 10.03±11.41 |
| Adiponectin (mg L <sup>-1</sup> ) | 12.79±7.42  |
| Resistin (µg L <sup>-1</sup> )    | 18.41±24.13 |

BMI, body mass index.

Data are presented as mean ±standard deviation, or percentages of subjects, as appropriate. The subjects were diagnosed by using the Chinese age- and sex-specific BMI cutoffs.<sup>1</sup>

<sup>1</sup> Ji CY, Working Group on Obesity in China. Report on childhood obesity in China (1)--body mass index reference for screening overweight and obesity in Chinese school-age children. *Biomed Environ Sci* 2005;18:390-400.

Supplementary TABLE 2: Interaction between rs17782313 and rs6265 on low adiponectin.

| SNP               | Adjusted for age and gender |             |                | Adjusted for age ,gender and BMI |            |                | Adjusted for age ,gender and obesity statues |             |                |
|-------------------|-----------------------------|-------------|----------------|----------------------------------|------------|----------------|----------------------------------------------|-------------|----------------|
|                   | $\beta$                     | 95% CI      | <i>P-value</i> | $\beta$                          | 95% CI     | <i>P-value</i> | $\beta$                                      | 95% CI      | <i>P-value</i> |
| rs17782313*rs6265 | 0.950                       | 0.775-1.164 | 0.620          | 0.958                            | 0.778-1.18 | 0.688          | 0.96                                         | 0.780-1.179 | 0.691          |

CI, confidence interval.

Supplementary TABLE 3: Adiponectin and BMI in groups with different genotypes of rs17782313 and rs6265.

| SNP        | Gene        | Genotype | N    | Adiponectin (mg L <sup>-1</sup> ) | BMI (kg m <sup>-2</sup> ) |
|------------|-------------|----------|------|-----------------------------------|---------------------------|
| rs17782313 | <i>MC4R</i> | CC       | 186  | 11.63±7.65                        | 23.11±5.20                |
|            |             | CT       | 1230 | 12.59±7.25                        | 22.17±4.89                |
|            |             | TT       | 2028 | 13.02±7.48                        | 21.63±4.92                |
| rs6265     | <i>BDNF</i> | GG       | 971  | 12.31±6.91                        | 22.25±4.99                |
|            |             | GA       | 1744 | 12.72±7.45                        | 21.88±4.90                |
|            |             | AA       | 733  | 13.63±7.92                        | 21.54±4.93                |

*MC4R*, the melanocortin-4 receptor gene; *BDNF*, the brain-derived neurotrophic factor gene.

Adiponectin are expressed as the mean±standard deviation.
